# Supplementary material
Source: Research Square preprint supplement (doi:10.21203/rs.3.rs-9023001/v1)
Supplement: Supplementary file 1 [file 630077442ec9cfafa76b2b60.xlsx]

## Sheet: species_abundance
Season	Station	Amphipoda	Chaetognatha	Copepoda	Cypris larvae	Decapoda	Fish Larvae	Gastropoda	Insecta	Jellyfish Larvae	Mysida	Polychaete larvae
Monsoon	Station-1	1.11401	7.79808	207.206	0.318289	49.6531	1.75059	5.25177	0.477433	0.159144	85.6197	0.159144
Monsoon	Station-2	4.25816	18.5811	656.725	1.74197	264.78	1.54842	4.25816	0.193553	0	22.065	0.193553
Monsoon	Station-3	3.16756	56.3276	1213.45	0.413161	6.33513	0.27544	1.23948	0	0.27544	13.0834	0.13772
Monsoon	Station-4	3.67255	3.12167	283.338	1.46902	16.5265	1.83628	1.46902	0	0.183628	67.3914	0.734511
Monsoon	Station-5	2.08257	0.640789	126.876	0.800987	31.0783	2.08257	0.640789	0.480592	0	105.089	0
Winter	Station-1	2.51577	25.1577	3862.71	1.00631	18.7844	0	167.047	2.01261	0.335435	6.54099	1.34174
Winter	Station-2	1.46768	5.07018	1807.65	0.400278	11.0743	0.667129	9.47323	1.33426	0	6.93814	1.86796
Winter	Station-3	2.4695	1.64633	1827.6	1.31707	25.1889	5.4329	26.6706	0.658534	0.164633	5.26827	0.823167
Winter	Station-4	1.2638	4.42329	1067.07	0.421265	17.0613	2.31696	24.2228	1.68506	0.421265	33.28	2.10633
Winter	Station-5	0.27544	1.23948	25.4782	0.550881	9.08953	0	26.8554	0	0.413161	0	0
Pre-monsoon	Station-1	2.8313	0.333095	1134.52	0	6.99499	0.166547	15.6554	0.832737	0.333095	0.166547	0.666189
Pre-monsoon	Station-2	0.576377	0.720471	2099.02	0.288189	11.5275	0.432283	22.3346	0.288189	0.432283	1.44094	2.30551
Pre-monsoon	Station-3	1.54464	0.842531	2251.66	0.421265	7.16151	0.280844	102.929	0.561687	0.421265	1.96591	0.702109
Pre-monsoon	Station-4	1.85747	0.619157	697.996	0.206386	19.813	0	26.0046	0	1.03193	8.04904	0.825542
Pre-monsoon	Station-5	0.873347	0.698678	480.516	0.873347	30.9165	0	0.174669	0.349339	0.524008	13.6242	0.873347

## Sheet: species
Phylum	Class	Order	Taxa identified
Arthropoda	Maxillopoda	Calanoida	Acartia erythraea, Acartia sp., Calanus finmarchicus, Calanus pacificus, Calanus spp.
Arthropoda	Maxillopoda	Cyclopoida	Thermocyclops crassus
Arthropoda	Thecostraca	Sessilia	Balanus cypris larvae
Arthropoda	Malacostraca	Mysida	Mysidopsis bahia, Mysidopsis sp.
Arthropoda	Malacostraca	Amphipoda	Gammarus sp., Grandidierella megnae
Arthropoda	Malacostraca	Decapoda	Scylla serrata, Lucifer hanseni, Megalopa, Zoea larvae, Shrimp larvae
Arthropoda	Insecta	Hemiptera	Micronecta sp.
Mollusca	Gastropoda	Littorinimorpha	Rissoa sitta, Veliger larvae
Annelida	Polychaeta	Phyllodocida	Polychaete larvae
Chordata	Actinopterygii	Various	Fish larvae
Cnidaria	Hydrozoa	–	Jellyfish larvae
Chaetognatha	Sagittoidea	Aphragmophora	Sagitta bedoti, Sagitta bipunctata

## Sheet: zooplankton_count
Season	Station	Amphipoda	Chaetognatha	Copepoda	Cypris larvae	Decapoda	Fish Larvae	Gastropoda	Insecta	Jellyfish Larvae	Mysida	Polychaete larvae
Monsoon	Station-1	7	49	1302	2	312	11	33	3	1	538	1
Monsoon	Station-2	22	96	3393	9	1368	8	22	1	0	114	1
Monsoon	Station-3	23	409	8811	3	46	2	9	0	2	95	1
Monsoon	Station-4	20	17	1543	8	90	10	8	0	1	367	4
Monsoon	Station-5	13	4	792	5	194	13	4	3	0	656	0
Winter	Station-1	15	150	23031	6	112	0	996	12	2	39	8
Winter	Station-2	11	38	13548	3	83	5	71	10	0	52	14
Winter	Station-3	15	10	11101	8	153	33	162	4	1	32	5
Winter	Station-4	6	21	5066	2	81	11	115	8	2	158	10
Winter	Station-5	2	9	185	4	66	0	195	0	3	0	0
Pre-monsoon	Station-1	17	2	6812	0	42	1	94	5	2	1	4
Pre-monsoon	Station-2	4	5	14567	2	80	3	155	2	3	10	16
Pre-monsoon	Station-3	11	6	16035	3	51	2	733	4	3	14	5
Pre-monsoon	Station-4	9	3	3382	1	96	0	126	0	5	39	4
Pre-monsoon	Station-5	5	4	2751	5	177	0	1	2	3	78	5

## Sheet: count with abundance
Season	Station	Amphipoda	Chaetognatha	Copepoda	Cypris larvae	Decapoda	Fish Larvae	Gastropoda	Insecta	Jellyfish Larvae	Mysida	Polychaete larvae	Water Volume (m3)	Amphipoda	Chaetognatha	Copepoda	Cypris larvae	Decapoda	Fish Larvae	Gastropoda	Insecta	Jellyfish Larvae	Mysida	Polychaete larvae
Monsoon	Station-1	7	49	1302	2	312	11	33	3	1	538	1	6.28365	1.11401	7.79808	207.206	0.318289	49.6531	1.75059	5.25177	0.477433	0.159144	85.6197	0.159144
Monsoon	Station-2	22	96	3393	9	1368	8	22	1	0	114	1	5.16656	4.25816	18.5811	656.725	1.74197	264.78	1.54842	4.25816	0.193553	0	22.065	0.193553
Monsoon	Station-3	23	409	8811	3	46	2	9	0	2	95	1	7.2611	3.16756	56.3276	1213.45	0.413161	6.33513	0.27544	1.23948	0	0.27544	13.0834	0.13772
Monsoon	Station-4	20	17	1543	8	90	10	8	0	1	367	4	5.44583	3.67255	3.12167	283.338	1.46902	16.5265	1.83628	1.46902	0	0.183628	67.3914	0.734511
Monsoon	Station-5	13	4	792	5	194	13	4	3	0	656	0	6.42328	2.08257	0.640789	126.876	0.800987	31.0783	2.08257	0.640789	0.480592	0	105.089	0
Winter	Station-1	15	150	23031	6	112	0	996	12	2	39	8	5.96248	2.51577	25.1577	3862.71	1.00631	18.7844	0	167.047	2.01261	0.335435	6.54099	1.34174
Winter	Station-2	11	38	13548	3	83	5	71	10	0	52	14	7.49849	1.46768	5.07018	1807.65	0.400278	11.0743	0.667129	9.47323	1.33426	0	6.93814	1.86796
Winter	Station-3	15	10	11101	8	153	33	162	4	1	32	5	6.07419	2.4695	1.64633	1827.6	1.31707	25.1889	5.4329	26.6706	0.658534	0.164633	5.26827	0.823167
Winter	Station-4	6	21	5066	2	81	11	115	8	2	158	10	4.74765	1.2638	4.42329	1067.07	0.421265	17.0613	2.31696	24.2228	1.68506	0.421265	33.28	2.10633
Winter	Station-5	2	9	185	4	66	0	195	0	3	0	0	7.2611	0.27544	1.23948	25.4782	0.550881	9.08953	0	26.8554	0	0.413161	0	0
Pre-monsoon	Station-1	17	2	6812	0	42	1	94	5	2	1	4	6.00438	2.8313	0.333095	1134.52	0	6.99499	0.166547	15.6554	0.832737	0.333095	0.166547	0.666189
Pre-monsoon	Station-2	4	5	14567	2	80	3	155	2	3	10	16	6.93994	0.576377	0.720471	2099.02	0.288189	11.5275	0.432283	22.3346	0.288189	0.432283	1.44094	2.30551
Pre-monsoon	Station-3	11	6	16035	3	51	2	733	4	3	14	5	7.12147	1.54464	0.842531	2251.66	0.421265	7.16151	0.280844	102.929	0.561687	0.421265	1.96591	0.702109
Pre-monsoon	Station-4	9	3	3382	1	96	0	126	0	5	39	4	4.84539	1.85747	0.619157	697.996	0.206386	19.813	0	26.0046	0	1.03193	8.04904	0.825542
Pre-monsoon	Station-5	5	4	2751	5	177	0	1	2	3	78	5	5.7251	0.873347	0.698678	480.516	0.873347	30.9165	0	0.174669	0.349339	0.524008	13.6242	0.873347

## Sheet: parameters
Season	Station	Salinity (ppt)	Temperature (°C)	pH	DO (ppm)	Turbidity (ntu)	Silicate (ppb)	Nitrite (ppb)	Nitrate (ppb)	Phosphate (ppb)
Monsoon	Station-1	14.8	30.36	7.6	4.12	165	709.056	6.378	8.715	130.277
Monsoon	Station-2	17.8	30.03	8.2	4.5	168	181.582	344.807	120.137	100.07
Monsoon	Station-3	9.4	29.51	8.1	4.59	92	226.543	46.317	56.348	98.078
Monsoon	Station-4	10.7	30.21	8	4.55	45.51	383.469	25.934	19.57	112.684
Monsoon	Station-5	7.5	30.5	7.8	3.75	60	599.299	156.084	109.058	124.966
Winter	Station-1	34.6	22.7	7.51	5.32	2.35	874.37	47.5	245.77	433.33
Winter	Station-2	34.3	23	7.49	5.61	4.1	834.37	29.53	93.28	133.33
Winter	Station-3	32.6	24.8	7.59	5.94	4.01	919.86	10.51	81.68	100
Winter	Station-4	34	24	7.69	5.42	3.2	410.13	7.057	484.81	33.33
Winter	Station-5	32.8	22.8	8.09	4.65	4.74	677.16	26.3	203.86	166.67
Pre-monsoon	Station-1	27.4	32.2	8.89	4.29	16.08	340.4	15.5	108.86	100
Pre-monsoon	Station-2	29.7	30.5	8.05	4.03	26.78	334.32	20.4	238.52	420
Pre-monsoon	Station-3	27.8	32.3	8.71	4.11	16.92	657.53	3.2	42.27	66.67
Pre-monsoon	Station-4	28.5	32.7	8.72	4.05	18.71	540.82	1.38	55.85	100
Pre-monsoon	Station-5	27.7	33.3	8.67	4.12	11.67	979.03	5.65	73.24	133.33
